# Supplementary material for: Genetic Control of Differential Acetylation in Diabetic Rats
Source: PLoS One. 2014 Apr 17;9(4):e94555. doi: 10.1371/journal.pone.0094555 (PMC3990556; doi:10.1371/journal.pone.0094555)
Supplement: Table S6 — Acetylated peptides in GK and BN rat liver, and their transcriptional expression. (XLS) [file pone.0094555.s008.xls]

## Sheet: acet-list
Supporting Table S6. Acetylated peptides in GK and BN rat liver, and their transcriptional expression. logFC, log 2 fold-change.
K* indicates position of acetylated lysine (in some cases, different acetylation patterns were observed for the same peptide).
"Sirt3 target" indicates whether the protein was identified to be acetylated in a Sirt3-knockout mouse study.
							Illumina microarray data					RNA-sequencing
Protein description	Gene Symbol	Sirt3 target (Rardin 2013)	Sirt3 target (Hebert 2013)	Acetylation GK/BN logFC	Peptide sequence	KEGG pathway(s)	GK/BN logFC	GK/BN adjusted p-value	1Cons/BN logFC	1Cons/BN adjusted p-value	Probe	GK/BN logFC	adjusted p-value
3-Alpha-Hydroxysteroid Dehydrogenase	Akr1c3	no	no	0.15242	KYK*QTPALVALR	Bile acid biosynthesis; Steroid hormone biosynthesis	-0.294883	0.190495	0.180362	0.593144	5420040	nf	nf
40S Ribosomal protein S19-like	LOC502302	no	no	BN only	ALAAFLKK*	Ribosome	-0.263648	0.00489758	-0.0364581	0.812485	6110722	nf	nf
4-Hydroxyphenylpyruvate dioxygenase	Hpd	no	yes	2.33245	HGDGVK*DIAFEVEDCEHIVQK	Ubiquinone and other terpenoid-quinone biosynthesis; tyrosine and phenylalanine metabolism	-0.426483	0.000301125	0.0968508	0.533385	110706	-1.28819	2.01469e-15
Acetyl-CoA acetyltransferase 1	Acat1	yes	yes	0.782531	IHMGNCAENTAK*K	Fatty acid metabolism; synthesis and degradation of ketone bodies; degradation of valine, leucine, isoleucine, lysine; metabolism of tryptophan, pyruvate, glyoxylate, dicarboxylate, propanoate, butanoate; biosynthesis of terpenoid backbone.	0.119335	0.480572	-0.0795273	0.757839	460494	-0.220446	0.395717
Acetyl-CoA acetyltransferase 1	Acat1	yes	yes	BN only	AGIPK*EVVK*EAYMGNVLQGGEGQAPTR	Fatty acid metabolism; synthesis and degradation of ketone bodies; degradation of valine, leucine, isoleucine, lysine; metabolism of tryptophan, pyruvate, glyoxylate, dicarboxylate, propanoate, butanoate; biosynthesis of terpenoid backbone.	0.119335	0.480572	-0.0795273	0.757839	460494	-0.220446	0.395717
Acetyl-CoA acetyltransferase 1	Acat1	yes	yes	BN only	AGIPK*EVVKEAYMGNVLQGGEGQAPTR	Fatty acid metabolism; synthesis and degradation of ketone bodies; degradation of valine, leucine, isoleucine, lysine; metabolism of tryptophan, pyruvate, glyoxylate, dicarboxylate, propanoate, butanoate; biosynthesis of terpenoid backbone.	0.119335	0.480572	-0.0795273	0.757839	460494	-0.220446	0.395717
Acetyl-CoA acetyltransferase 1	Acat1	yes	yes	BN only	AGIPKEVVK*EAYMGNVLQGGEGQAPTR	Fatty acid metabolism; synthesis and degradation of ketone bodies; degradation of valine, leucine, isoleucine, lysine; metabolism of tryptophan, pyruvate, glyoxylate, dicarboxylate, propanoate, butanoate; biosynthesis of terpenoid backbone.	0.119335	0.480572	-0.0795273	0.757839	460494	-0.220446	0.395717
Acetyl-CoA acetyltransferase 1	Acat1	yes	yes	BN only	EVVK*EAYMGNVLQGGEGQAPTR	Fatty acid metabolism; synthesis and degradation of ketone bodies; degradation of valine, leucine, isoleucine, lysine; metabolism of tryptophan, pyruvate, glyoxylate, dicarboxylate, propanoate, butanoate; biosynthesis of terpenoid backbone.	0.119335	0.480572	-0.0795273	0.757839	460494	-0.220446	0.395717
Acetyl-CoA acetyltransferase 2	Acat2	no	yes	BN only	EAQDK*VAVVSQNRAEHAQK	Fatty acid metabolism; synthesis and degradation of ketone bodies; degradation of valine, leucine, isoleucine, lysine; metabolism of tryptophan, pyruvate, glyoxylate, dicarboxylate, propanoate, butanoate; biosynthesis of terpenoid backbone.	nf	nf	nf	nf	nf	nf	nf
acetyl-Coenzyme A acyltransferase 2	Acaa2	no	yes	GK only	AALAAGK*VPPETIDSVIVGNVMQSSSDAAYLAR	Fatty acid elongation; Fatty acid metabolism; Valine, leucine and isoleucine degradation; Benzoate degradation	-0.280973	0.0677335	0.0822942	0.742605	2690538	-0.227036	0.313187
acetyl-Coenzyme A acyltransferase 2	Acaa2	no	yes	GK only	EGTVTAGNASGMSDGAGVVIIASEDAVKK*HNFTPLAR	Fatty acid elongation; Fatty acid metabolism; Valine, leucine and isoleucine degradation; Benzoate degradation	-0.280973	0.0677335	0.0822942	0.742605	2690538	-0.227036	0.313187
Aconitate hydratase, mitochondrial	Aco	yes	no	1.18615	YYK*K*HGIR	TCA cycle; glyoxylate and dicarboxylate metabolism	-0.00411831	0.97666	0.211892	0.184731	6650047	-0.0874772	0.786537
Aconitate hydratase, mitochondrial	Aco	yes	no	1.18615	YYKK*HGIR	TCA cycle; glyoxylate and dicarboxylate metabolism	-0.00411831	0.97666	0.211892	0.184731	6650047	nf	nf
Actin	Act	yes	no	-1.79042	GVLSLK*YPIEHGIVTNWDDMEKIWHHTFYNELR		0.265976	0.229084	0.403978	0.183856	5130348	-0.498398	0.0129935
Actin	Act	yes	no	-0.292598	HK*GVMVGMGQKDAYVGDEAQSK		0.265976	0.229084	0.403978	0.183856	5130348	-0.498398	0.0129935
Actin	Act	yes	no	-0.133954	HQGVMVGMGQK*DSYVGDEAQSK		0.265976	0.229084	0.403978	0.183856	5130348	-0.498398	0.0129935
Actin	Act	yes	no	-0.560248	HTGVMVGMGQK*DAYVGDEAQSKR		0.258074	0.00424539	0.235796	0.0551159	3170100	-0.498398	0.0129935
Actin	Act	yes	no	2.19987	HTGVMVGMGQK*DAYVGDEAQSKR		0.340653	0.0442613	0.355445	0.130586	4760022	-0.498398	0.0129935
Acyl-CoA dehydrogenase, medium-chain specific	Acadm	yes	yes	GK only	QEPGLGFSFELTEQQK*EFQATAR	Fatty acid metabolism, Valine, leucine and isoleucine degradation, beta-Alanine metabolism, Propanoate metabolism, PPAR signaling pathway	-0.0790166	0.299491	0.0799016	0.458894	6370400	-0.451651	0.0172909
Adenosine kinase	Adk	no	yes	GK only	FK*VEYHAGGSTQNSMK	Purine metabolism	-0.125143	0.384099	-0.111527	0.591446	6550463	-0.213577	0.348595
Adenylate kinase isozyme 3	Ak3	yes	yes	GK only	HFELK*HLSSGDLLR	Pyrimidine metabolism	-0.17775	0.0466063	-0.0642306	0.641951	4850075	-0.11584	0.75206
Albumin	Alb	yes	yes	0.204286	EFK*AETFTFHSDICTLPDKEK		0.0498796	0.58695	0.113691	0.337763	1410575	-0.166068	0.521732
Albumin	Alb	yes	yes	-0.779915	FK*DLGEQHFKGLVLIAFSQYLQK		0.0498796	0.58695	0.113691	0.337763	1410575	-0.166068	0.521732
Albumin	Alb	yes	yes	-0.779915	FKDLGEQHFK*GLVLIAFSQYLQK		0.0482522	0.67037	-0.0216066	0.907892	3290390	-0.166068	0.521732
Albumin	Alb	yes	yes	0.556581	GLVLIAFSQFLQK*		0.0482522	0.67037	-0.0216066	0.907892	3290390	-0.166068	0.521732
Albumin	Alb	yes	yes	BN only	QIKK*QTALAELVK		0.0498796	0.58695	0.113691	0.337763	1410575	-0.166068	0.521732
Albumin	Alb	yes	yes	-2.27902	TNCELYEK*LGEYGFQNAILVR		0.0482522	0.67037	-0.0216066	0.907892	3290390	-0.166068	0.521732
Albumin	Alb	yes	yes	-0.660193	YMCENQASISSK*		0.0498796	0.58695	0.113691	0.337763	1410575	-0.166068	0.521732
Albumin	Alb	yes	yes	-1.50294	YMCENQATISSKLQTCCDK*PLLK*		0.0482522	0.67037	-0.0216066	0.907892	3290390	-0.166068	0.521732
Alcohol dehydrogenase	Adh	yes	no	1.10822	GK*PIHHFISTSTFSQYTVVDDIAVAK	Glycolysis / gluconeogenesis; Fatty acid metabolism; metabolism of tyrosine and retinol; degradation of naphthalene, chloroalkane and chloroalkene; retinol metabolism; cytochrome P450 metabolism of xenobiotics.	-0.393114	0.0236195	-0.113501	0.674406	3120754	-1.38955	7.84813e-13
Alcohol dehydrogenase	Adh	yes	no	1.10822	GK*PIHHFLSTSTFSQYTVVDDIAVAK	Glycolysis / gluconeogenesis; ascorbate and aldarate metabolism; fatty acid metabolism; degradation of valine, leucine, isoleucine, lysine; metabolism of arginine, proline, histidine, tryptophan, beta-alanine; metabolism of glycerolipid, pyruvate, propanoate.	-0.393114	0.0236195	-0.113501	0.674406	3120754	-1.38955	7.84813e-13
Alcohol dehydrogenase	Adh	yes	no	-0.246039	ICK*HPESNLCCQTK	Glycolysis / gluconeogenesis; Fatty acid metabolism; metabolism of tyrosine and retinol; degradation of naphthalene, chloroalkane and chloroalkene; retinol metabolism; cytochrome P450 metabolism of xenobiotics.	-0.393114	0.0236195	-0.113501	0.674406	3120754	-1.38955	7.84813e-13
Aldehyde dehydrogenase 9A1	Aldh9a1	yes	yes	-0.428597	VFVQK*EIADAFTKEVVR		variant in probe					-0.857076	5.18859e-08
Alpha-2u globulin, major urinary protein15.5 kDa fatty acid-binding protein		no	no	GK only	GNLDVAK*LNGDWFSIVVASNKR		-0.887274	0.322658	-0.716283	0.584515	7040647	0.409189	0.0315545
Alpha-albumin; afamin precursor	Afm	no	no	BN only	IANDAIQDMLCDMK*GLPQK*		0.360854	0.000946456	0.309651	0.0331818	1450725	-0.302189	0.12289
Alpha-methylacyl-CoA racemase	Amacr	yes	yes	GK only	RDPSVGEHTVEVLK*DYGFSQEEIHQLHSDR	Primary bile acid biosynthesis; Lipid Metabolism; peroxisome	-0.174739	0.0513756	0.0110492	0.948794	6760605	-0.0228591	1
AP-2 complex subunit alpha-1 isoform a	Ap2a1	no	yes	GK only	EMGEAFAADIPRILVAGDSMDSVK*	endocytosis	nf	nf	nf	nf	nf	-0.0443817	0.942757
Arf-GAP domain and FG repeats-containing protein 1	Agfg1	no	no	GK only	VKEFLQEK*YEK*	Influenza A	nf	nf	nf	nf	nf	0.277217	0.361407
Arginase 1	Arg1	no	yes	0.0888093	QQQQQQEPWMSMSSKPK*PIEIIGAPFSK*GQPR	Arginine and proline metabolism	-0.600873	2.5775e-05	-0.117289	0.490468	2650026	0.200391	0.363501
Arginase 1	Arg1	no	yes	0.0888093	QQQQQQEPWMSMSSKPK*PIEIIGAPFSKGQPR	Arginine and proline metabolism	-0.600873	2.5775e-05	-0.117289	0.490468	2650026	0.200391	0.363501
ATP synthase subunit alpha	Atp5a	yes	no	GK only	K*SVNEPLQTGLKAIDALVPIGR	Oxidative phosphorylation	0.111269	0.243349	0.0366124	0.818466	2510161	-0.244841	0.258725
ATP synthase subunit b	Atp5b	yes	yes	0.304451	AQQALVQK*R	Oxidative phosphorylation	0.0803068	0.330622	0.0415515	0.748515	6400563	-0.140654	0.586484
ATP synthase subunit d	Atp5d	yes	yes	1.10751	VREYEK*QLEK	Oxidative phosphorylation	-0.0654187	0.554945	0.107401	0.47075	6980717	-0.379957	0.0516015
Betaine-homocysteine methyltransferase, pseudogene 1	Bhmt-like	no	yes	-0.10181	GNYVAEK*ISGQKVNEAACGIAR	Glycine, serine and threonine metabolism; cysteine and methionine metabolism	-1.93324	1.60837e-06	0.173502	0.708899	6380373	-1.60636	6.78012e-08
Betaine-homocysteine methyltransferase, pseudogene 1	Bhmt-like	no	yes	-0.10181	GNYVAEKISGQK*VNEAACGIAR	Glycine, serine and threonine metabolism; cysteine and methionine metabolism	-1.93324	1.60837e-06	0.173502	0.708899	6380373	-1.60636	6.78012e-08
Betaine-homocysteine S-methyltransferase 1	Bhmt	no	yes	-0.041328	GAAELMQQK*EATTEQQLR	Glycine, serine and threonine metabolism; cysteine and methionine metabolism	-1.93324	1.60837e-06	0.173502	0.708899	6380373	-1.60636	6.78012e-08
Beta-lactamase	Lactb	yes	yes	GK only	IVVK*IVK		0.229481	0.00457507	-0.068439	0.557764	3940021	0.261486	0.2193
Biphenyl hydrolase-like (serine hydrolase)	Bphl	yes	yes	BN only	LHLMPEGK*HNLHLR		0.274964	0.015762	-0.0291698	0.889812	5690025	-0.0868176	0.840832
Butyryl Coenzyme A synthetase 1	Bucs1	no	no	1.36813	MAK*HNQGLAFR	Butanoate metabolism	-0.380231	0.000547426	-0.17769	0.202698	6650576	-1.02696	2.07738e-11
Carbamoyl-phosphate synthase, large subunit	Cps1	yes	yes	-0.220139	NILGTSPLRIDDAENRHK*	Pyrimidine metabolism; urea cycle; alanine, aspartate and glutamate metabolism; arginine and proline metabolism	0.139468	0.280775	0.0403158	0.857048	3780398	-0.90565	4.49669e-08
carbamoyl-phosphate synthetase 2, aspartate transcarbamylase, and dihydroorotase	Cad	no	no	GK only	ALKEEGIQTVLVNPNIATVQTDAEMADQVYLQPLNVSSVKK*	Pyrimidine metabolism; urea cycle; alanine, aspartate and glutamate metabolism; arginine and proline metabolism	0.139468	0.280775	0.0403158	0.857048	3780398	0.154138	0.708139
Carbamylphosphate synthetase 1	Cps1	yes	yes	-0.9206	VLGVDFAEK*AAR	Pyrimidine metabolism; urea cycle; alanine, aspartate and glutamate metabolism; arginine and proline metabolism	0.139468	0.280775	0.0403158	0.857048	3780398	-0.90565	4.49669e-08
Catalase	Cat	yes	yes	-0.137549	AVK*NFTDVHPDYGAR	hydrogen peroxide metab, trp metab, Glyoxylate and dicarboxylate metabolism	0.0379221	0.883436	-0.132852	0.681039	6760348	0.0495464	0.875834
Catalase	Cat	yes	yes	GK only	KAVK*NFTDVHPDYGAR	hydrogen peroxide metab, trp metab, Glyoxylate and dicarboxylate metabolism	0.0379221	0.883436	-0.132852	0.681039	6760348	0.0495464	0.875834
Chaperone DnaK		no	no	GK only	MKETAEAYLGTAVK*NAVVTVPAYFNDSQR	RNA degradation	nf	nf	nf	nf	nf	nf	nf
Choline dehydrogenase	Chdh	yes	yes	GK only	AQK*HELGANMYR	Glycine, serine and threonine metabolism	0.230561	0.0412699	0.144735	0.370107	2510592	-0.734543	7.06075e-06
Cytochrome b5	Cyb5a	yes	yes	0.264635	AEQSDK*DVKYYTLEEIQK		0.0466803	0.589538	0.0107116	0.943046	4200056	-0.112852	0.707843
Diazepam binding inhibitor	Dbi	yes	yes	-0.557678	LK*TQPTDEEMLFIYSHFK	PPAR signaling pathway	0.0628435	0.58411	0.127364	0.396678	3780273	0.0649246	0.863277
Dihydrolipoamide dehydrogenase	Dld	no	yes	GK only	QGFKFK*LNPK*	Glycolysis / gluconeogenesis; TCA cycle; glycine, serine and threonine metabolism; valine, leucine and isoleucine degradation; pyruvate metabolism	0.382161	0.00239429	0.0656968	0.729767	3940025	0.394186	0.0359282
Dihydrolipoamide dehydrogenase	Dld	no	yes	-0.162219	YQDKEGK*LALGGTCLNVGCIPSK	Glycolysis / gluconeogenesis; TCA cycle; glycine, serine and threonine metabolism; valine, leucine and isoleucine degradation; pyruvate metabolism	0.382161	0.00239429	0.0656968	0.729767	3940025	0.394186	0.0359282
Dihydrolipoyllysine-residue succinyltransferase component of 2-oxoglutarate dehydrogenase complex	Dlst	yes	yes	GK only	HK*DAFLK*K	TCA cycle; lysine degradation	-0.348351	0.00169757	0.142757	0.334001	3940128	-0.0984745	0.735944
Dihydrolipoyllysine-residue succinyltransferase component of 2-oxoglutarate dehydrogenase complex	Dlst	yes	yes	GK only	HKDAFLKK*	TCA cycle; lysine degradation	-0.348351	0.00169757	0.142757	0.334001	3940128	-0.0984745	0.735944
Dihydropyrimidinase	Dpys	no	yes	0.0714597	APYKGEVITLK*PR	Pyrimidine metabolism; beta-alanine metabolism; pantothenate and CoA biosynthesis	0.329088	8.45043e-05	0.0327976	0.780365	4760451	-0.253372	0.218263
Dihydropyrimidinase	Dpys	no	yes	BN only	GVHSGK*MDENRFVAVTSTNAAK	Pyrimidine metabolism; beta-alanine metabolism; pantothenate and CoA biosynthesis	0.329088	8.45043e-05	0.0327976	0.780365	4760451	-0.253372	0.218263
Dimethylglycine dehydrogenase	Dmgdh	yes	yes	GK only	MIGLEHPLIPVQHQYVVTSTIPEVK*	Glycine, serine and threonine metabolism	-0.152731	0.416312	0.233772	0.35955	2940142	0.388262	0.0957739
Electron transfer flavoprotein subunit alpha	Etfa	yes	yes	1.32824	IVAPQLYIAVGISGAIQHLAGMK*GSK	Nitrogen metabolism	0.00667611	0.966224	-0.0517036	0.801809	4610576	0.0625421	0.798009
Electron transfer flavoprotein subunit alpha	Etfa	yes	yes	1.32824	IVAPQLYIAVGISGAIQHLAGMKGSK*	Nitrogen metabolism	0.00667611	0.966224	-0.0517036	0.801809	4610576	0.0625421	0.798009
Enoyl-CoA delta isomerase 1, mitochondrial	Eci1	yes	no	GK only	SVMAK*WFTIPDHSR	Fatty acid metabolism	-0.141027	0.592545	0.0439475	0.921976	3840551	-0.583422	0.00139645
Enoyl-CoA hydratase/3-ketoacyl-CoA thiolase, mitochondrial	Echs1	yes	no	0.023795	VRK*PVIAAVNGYALGGGCGLAMMCDIIYAGEK	Fatty acid metabolism; degradation of valine, leucine, isoleucine, lysine; degradation of benzoate, aminobenzoate, caprolactam; metabolism of tryptophan, beta-alanine; metabolism of propanoate, butanoate; PPAR signalling pathway; peroxisome	-0.237008	0.00691977	-0.12146	0.315133	5910452	-0.363378	0.0745402
ES1 protein homolog, mitochondrial precursor	RGD1303003	yes	no	0.19479	VIK*GVEVTVGHEQEEGGKWPYAGTAEAVK		-0.519594	8.34115e-05	-0.160836	0.312998	940176	-0.385704	0.0504175
Fatty acid-binding protein-I	Fabp1	yes	yes	0.235421	MNFSGK*YQVQSQENFEPFMK	PPAR signaling pathway; fat digestion, absorption	0.23471	0.0507796	0.0877983	0.636776	3780037	-0.16228	0.574323
Fatty acid-binding protein-I	Fabp1	yes	yes	-0.137215	SVTEFNGDTITNTMTLGDIVYK*R	PPAR signaling pathway; fat digestion, absorption	0.23471	0.0507796	0.0877983	0.636776	3780037	-0.16228	0.574323
Fatty acid-binding protein-II	Fabp2	no	yes	-1.409	VHLTDAEK*AAVNGLMGK	PPAR signaling pathway; fat digestion, absorption	0.620654	0.0563276	-0.285622	0.558948	1850056	0.00270768	1
Fatty acid-binding protein-II	Fabp2	no	yes	-1.409	VHLTDAEKAAVNGLMGK*	PPAR signaling pathway; fat digestion, absorption	0.620654	0.0563276	-0.285622	0.558948	1850056	0.00270768	1
Fatty acid-binding protein-II	Fabp2	no	yes	-0.196041	VHLTDAEKAAVNGLFGK*	PPAR signaling pathway; fat digestion, absorption	0.620654	0.0563276	-0.285622	0.558948	1850056	0.00270768	1
Formimidoyltransferase-cyclodeaminase	Ftcd	no	yes	BN only	K*VQGIGWYLEEK*	Histidine metabolism; folate one carbon pool	variant in probe					-0.586344	0.000637738
Fumarate hydratase, mitochondrial	Fh	yes	yes	GK only	MPIPVIK*AFGILKR	TCA cycle; renal cell carcinoma	-0.539789	1.98537e-05	0.0320965	0.860449	2570020	-1.16756	4.35343e-14
Glutamic-oxaloacetic transaminase 2, mitochondrial (aspartate aminotransferase 2)	Got2	yes	yes	GK only	SSWWTHVEMGPPDPILGVTEAFK*R	Alanine, aspartate and glutamate metabolism; metabolism of cysteine, methionine, arginine, proline, tyrosine, phenylalanine; biosynthesis of phenylalanine, tyrosine, tryptophan; fat digestion and absorption	0.157428	0.0964792	0.172937	0.192194	2360717	-0.35083	0.0943801
Glutathione S-transferase 1, microsomal	Mgst1	yes	yes	GK only	LTNKVFANPEDCAGFGK*GENAK*	Glutathione metabolism; cytochrome P450 metabolism of xenobiotics	0.0098169	0.934645	-0.0105622	0.952026	5550408	-0.436639	0.0208865
Glutathione S-transferase alpha-3	Gsta1	no	no	-0.569223	VSNLPTVK*K	Glutathione metabolism; cytochrome P450 metabolism of xenobiotics	variant in probe					0.402254	0.0374758
Glutathione Transferase	Gstm1	no	yes	GK only	MK*LYSEFLGK*RPNFAGDK*	Glutathione metabolism; cytochrome P450 metabolism of xenobiotics	variant in probe					0.467802	0.0229278
Glyceraldehyde-3-phosphate dehydrogenase	Gapdh	no	no	1.21827	VIHDNFGIVEGLMTTVHAVTATQK*	Glycolysis / Gluconeogenesis	0.341633	0.0221942	-0.33311	0.10747	1170044	-0.245071	0.261642
Glyceraldehyde-3-phosphate dehydrogenase	Gapdh	no	no	1.42508	VIHDNFGIVK*GLMTTVHAITATQK	Glycolysis / Gluconeogenesis	0.341633	0.0221942	-0.33311	0.10747	1170044	-0.245071	0.261642
Glycerol-3-phosphate dehydrogenase	Gpd1	no	yes	-0.83467	AGK*KVCIVGSGNWGSAIAK	Glycerophospholipid metabolism	0.4957	8.64068e-05	0.433313	0.00782519	3710347	-0.177721	0.540437
Glycerol-3-phosphate dehydrogenase	Gpd1	no	yes	-0.83467	AGKK*VCIVGSGNWGSAIAK	Glycerophospholipid metabolism	0.4957	8.64068e-05	0.433313	0.00782519	3710347	-0.177721	0.540437
Heat shock cognate 71 kDa protein	LOC100364163	no	no	GK only	ITITNDKGLLSK*	Spliceosome; MAPK signaling pathway; Protein processing in endoplasmic reticulum; Endocytosis; Antigen processing and presentation	nf	nf	nf	nf	nf	nf	nf
Heat shock protein 70 cognate	Hspa8	no	yes	-0.578437	SK*GPAVGIDLGTTYSCVGVFQHGK	Spliceosome; MAPK signaling pathway; Protein processing in endoplasmic reticulum; Endocytosis; Antigen processing and presentation	-0.551301	0.00316061	-0.225304	0.376499	4850072	-1.3565	4.288e-11
Hemoglobin subunit alpha-2	Hba2	no	no	-0.0470675	K*VADALAK		-0.135431	0.209258	-0.100149	0.524007	6650278	-0.198946	0.779375
Hemoglobin subunit alpha-2	Hba2	no	no	-2.24493	VLSAADK*TNIKNCWGK		-0.135431	0.209258	-0.100149	0.524007	6650278	-0.198946	0.779375
Hemoglobin subunit alpha-2	Hba2	no	no	-2.24493	VLSAADKTNIK*NCWGK		-0.135431	0.209258	-0.100149	0.524007	6650278	-0.198946	0.779375
Hemoglobin subunit alpha-2	Hba2	no	no	-2.24493	VLSAADKTNIKNCWGK*		-0.135431	0.209258	-0.100149	0.524007	6650278	-0.198946	0.779375
Hemoglobin subunit beta	Hbb	no	no	0.855577	LLGNMIVIVLAHHLGK*DFTPSAQAAFQK		0.0256329	0.782137	-0.00718444	0.962356	2510524	-0.29471	0.588174
Hemoglobin subunit beta	Hbb	no	no	nf	LLVVYPWTQRFFESFGDLSSAAAVMGNPK*		0.0256329	0.782137	-0.00718444	0.962356	2510524	-0.29471	0.588174
Hemoglobin subunit beta	Hbb	no	no	-0.369054	LLVVYPWTQRYFDSFGDLPSASAIMGNAK*		0.0256329	0.782137	-0.00718444	0.962356	2510524	-0.29471	0.588174
Hemoglobin subunit beta	Hbb	no	no	0.589399	LLVVYPWTQRYFDSFGDLSSASAIMGNAK*		0.0256329	0.782137	-0.00718444	0.962356	2510524	-0.29471	0.588174
Hemoglobin subunit beta	Hbb	no	no	1.21184	VHLTDAEK*AAVNGLWGKVNPDDVGGEALGR		0.0256329	0.782137	-0.00718444	0.962356	2510524	-0.29471	0.588174
Hemoglobin subunit beta	Hbb	no	no	-1.70237	YFDSFGDLPSASAIMGNAK*		0.0256329	0.782137	-0.00718444	0.962356	2510524	-0.29471	0.588174
Hemoglobin subunit beta	Hbb	no	no	-1.29913	YFDSFGDLSSASAIMGNAK*		0.0256329	0.782137	-0.00718444	0.962356	2510524	-0.29471	0.588174
Hemoglobin subunit beta-2	Hbb2	no	no	-0.00588856	LLGNSIVIMMGHHLGK*EFTPSAQAAFQK		nf	nf	nf	nf	nf	nf	nf
Hemoglobin subunit beta-2	Hbb2	no	no	-0.773982	VHLTDAEK*ATVSGLWGK		nf	nf	nf	nf	nf	nf	nf
Hemoglobin subunit beta-2	Hbb2	no	no	-1.59112	VHLTDAEK*ATVSGLWGKVNADNVGAEALGR		nf	nf	nf	nf	nf	nf	nf
Hepatoma derived growth factor	Hdgf	no	yes	1.0878	STANK*YQVFFFGTHETAFLGPK		0.260742	0.010398	0.192861	0.165006	5670450	0.219552	0.325402
Histidine triad nucleotide-binding protein 1	Hint1	no	yes	0.274394	K*HISQISVADDDDESLLGHLMIVGKK	Cell-cycle regulation	variant in probe					0.0912841	0.697547
Immunoglobulin heavy chain binding protein	Hspa5	yes	yes	BN only	LGGK*LSSDDKETMEK*	Protein export; Protein processing in endoplasmic reticulum	0.158897	0.147137	0.18673	0.223898	2850373	-0.585673	0.000341111
Immunoglobulin kappa chain precursor	IgK	no	no	0.0135398	DGVLDSVTDQDSKDSTYSMSSTLSLSK*		-0.837737	0.091524	-0.476264	0.515534	2350026	nf	nf
Ketohexokinase	Khk	no	yes	GK only	FK*WIHIEGR	Fructose and mannose metabolism	0.284861	0.00826666	0.160666	0.278924	2680435	-0.294308	0.156769
Lactate dehydrogenase C	LdhC	no	no	GK only	IVSGK*DYSVSANSKLVIITAGAR	Glycolysis / Gluconeogenesis; Cysteine and methionine metabolism; Pyruvate metabolism; Propanoate metabolism	nf	nf	nf	nf	nf	nf	nf
L-lactate dehydrogenase A chain	LdhA	no	yes	BN only	AALK*DQLIVNLLK	Glycolysis / Gluconeogenesis; Cysteine and methionine metabolism; Pyruvate metabolism; Propanoate metabolism	0.346289	0.0229021	0.0799551	0.74492	3140576	-0.45738	0.0259893
L-lactate dehydrogenase A chain	LdhA	no	yes	BN only	EEQTPQNK*ITIVGVGAVGMACAISILMK	Glycolysis / Gluconeogenesis; Cysteine and methionine metabolism; Pyruvate metabolism; Propanoate metabolism	0.346289	0.0229021	0.0799551	0.74492	3140576	-0.45738	0.0259893
Lysine ketoglutarate reductase/saccharopine dehydrogenase	Lkr	no	no	GK only	APLAPK*HIK	Lysine degradation; Biosynthesis of secondary metabolites	-0.323909	0.00297857	-0.021976	0.910178	2680402	-1.6556	7.63441e-20
Lysine ketoglutarate reductase/saccharopine dehydrogenase	Lkr	no	no	GK only	APLAPKHIK*	Lysine degradation; Biosynthesis of secondary metabolites	-0.323909	0.00297857	-0.021976	0.910178	2680402	-1.6556	7.63441e-20
Lysine ketoglutarate reductase/saccharopine dehydrogenase	Lkr	no	no	GK only	RAPLAPK*HIK	Lysine degradation; Biosynthesis of secondary metabolites	-0.323909	0.00297857	-0.021976	0.910178	2680402	-1.6556	7.63441e-20
Malate dehydrogenase 1, NAD	Mdh1	yes	yes	BN only	DQVIVVGNPANTNCLTASKSAPSIPK*	Malate-aspartate shuttle (cytosolic form, MDH1); [TCA cycle (mito form, MDH2); Pyruvate metabolism; Glyoxylate and dicarboxylate metabolism	-0.20259	0.152459	-0.258732	0.188013	3130452	-0.18146	0.535856
NAD(P) transhydrogenase, mitochondrial	Nnt	yes	no	1.47693	EIFQNEK*R	Nicotinate and nicotinamide metabolism	0.321879	0.00205788	0.176968	0.198889	6900541	-0.127547	0.594277
Nucleolin	Ncl	no	yes	BN only	APAKVVPVK*AK*	Genetic Information Processing; Translation; Ribosome biogenesis	-0.336125	0.0241386	-0.0928411	0.688682	2350332	-0.258576	0.230677
Omega-amidase	Nit2	yes	yes	-0.965304	LALIQLQVSSIK*SDNVTR	Alanine, aspartate and glutamate metabolism	-0.00345908	0.971287	0.00181396	0.990093	6400538	-0.494925	0.00641766
Parathymosin, zinc binding protein	Ptms	no	yes	-1.10102	SEK*SVEAAAELSAK		0.268291	0.0539663	0.460692	0.0236395	1690725	-0.0671461	0.90104
Peptidyl-prolyl cis-trans isomerase A	Ppia	no	yes	0.780518	SIYGEK*FENDSFILK	[Protein folding]	0.446856	2.49574e-05	0.103929	0.401428	6290280	0.229504	0.286972
Peptidyl-prolyl cis-trans isomerase A	Ppia	no	yes	0.780518	SIYGEKFENDSFILK*	[Protein folding]	0.446856	2.49574e-05	0.103929	0.401428	6290280	0.229504	0.286972
Peptidyl-prolyl cis-trans isomerase A	Ppia	no	yes	BN only	VK*EGMSIVEAMER	[Protein folding]	0.446856	2.49574e-05	0.103929	0.401428	6290280	0.229504	0.286972
Peptidyl-prolyl cis-trans isomerase A (cyclophilin A)	Ppia	no	yes	BN only	SIYGEK*FENENFILK	Calcium signaling pathway	0.446856	2.49574e-05	0.103929	0.401428	6290280	0.229504	0.286972
Peptidyl-prolyl cis-trans isomerase A (cyclophilin A)	Ppia	no	yes	0.0254133	TDWLDGK*HVVFGHVK	Calcium signaling pathway	0.446856	2.49574e-05	0.103929	0.401428	6290280	0.229504	0.286972
Peptidyl-prolyl cis-trans isomerase A (cyclophilin A)	Ppia	no	yes	-1.19483	VK*EGMSIVEAMER	Calcium signaling pathway	0.446856	2.49574e-05	0.103929	0.401428	6290280	0.229504	0.286972
Phosphoglycerate kinase 2	Pgk2	no	no	BN only	GK*DASGQK	Glycolysis / Gluconeogenesis	nf	nf	nf	nf	nf	nf	nf
Phosphopantothenoylcysteine decarboxylase	Ppcdc	no	no	GK only	LAQAK*LAR	Pantothenate and CoA biosynthesis	-0.692759	1.13759e-05	-0.204811	0.240751	1240019	-0.133905	0.604273
Phytanoyl-CoA dioxygenase, peroxisomal precursor	Phyh	no	yes	BN only	VHLVMEK*GDTVFFHPLLIHGSGR	Peroxisome	-0.020291	0.879788	0.138754	0.367674	3710162	-0.823006	3.78396e-07
Protein disulfide-isomerase A4 precursor	PdiA4	no	yes	0.759988	FLK*VSLGKLVLMQPEK	Protein processing in endoplasmic reticulum	0.114728	0.471004	0.524897	0.0174358	770129	-0.691989	1.00806e-05
Ribosome receptor isoform mRRp5.4	Rrbp1	no	yes	BN only	GQGAQNQAPNQGKK*AEGAPNQGK*	Protein processing in endoplasmic reticulum	variant in probe					-0.0301301	0.949051
Ribosome-binding protein 1	Rrbp1	no	yes	GK only	AQEQQQRMAELHSK*	Protein processing in endoplasmic reticulum	variant in probe					-0.0301301	0.949051
S-Adenosylhomocysteine Hydrolase, Chain A	Ahcy	no	yes	-0.187308	ADK*LPYKVADIGLAAWGR	Cysteine and methionine metabolism	-0.475909	0.00100248	0.0384885	0.874056	5570494	-0.515641	0.00504215
Solute carrier family 25, member 5	Slc25a5	no	yes	1.05297	TDAAVSFAK*DFLAGGVAAAISK	Calcium signaling pathway	-0.0524701	0.782134	-0.0409926	0.891612	60014	-0.118639	0.663865
Sorbitol dehydrogenase	Sord	no	yes	-0.242416	AAPAK*GENLSLVVHGPGDIR	Fructose and mannose metabolism	-0.105669	0.252392	0.295157	0.0248843	6110129	-0.835401	7.60804e-08
Sorbitol dehydrogenase	Sord	no	yes	-0.242416	AAPAK*GKNLSLVVHGPGDIR	Fructose and mannose metabolism	-0.105669	0.252392	0.295157	0.0248843	6110129	-0.835401	7.60804e-08
Succinate dehydrogenase Fp subunit	Sdha	yes	yes	GK only	EPIPVLPTVHYNMGGIPTNYKGQVLK*	TCA cycle, oxidative phosphorylation, others	0.183165	0.0673015	0.00858499	0.965581	2640286	0.192557	0.391938
Succinyl-CoA synthetase alpha subunit	Suclg1	yes	yes	1.39042	K*HLGLPVFNTVK	TCA cycle	-0.0856767	0.464942	-0.0506768	0.780665	7040064	-0.0572818	0.899898
Transferrin	Tf	no	yes	BN only	CLTK*LPEGTTYEEYLGAEYLQAVGNIRK	Iron transport and homeostasis	0.0381178	0.706668	0.0385425	0.79468	3190022	-0.10969	0.691147
Transketolase, isoform CRA_a	Tkt	no	yes	1.38905	SK*DDQVTVIGAGVTLHEALAAAEMLKK	Pentose phosphate pathway	nf	nf	nf	nf	nf	0.443006	0.0255636
Tropomyosin 1, alpha	Tpm1	no	yes	-0.0762524	K*LVIIESDLERAEER	[Cardiac muscle contraction]	0.320854	0.00351906	-0.303082	0.0439001	6450056	0.400994	0.0332094
Tropomyosin alpha-3 chain	Tpm3	no	yes	-0.317819	K*LVIIEGDLERTEER	[Cardiac muscle contraction]	0.0297495	0.765905	-0.0364043	0.800268	4070750	-0.0416572	0.937886
Tropomyosin alpha-3 chain	Tpm3	no	yes	-0.317819	K*LVIIEGDLERTEER	[Cardiac muscle contraction]	0.0297495	0.765905	-0.0364043	0.800268	4070750	-0.0416572	0.937886
tropomyosin beta	Tpm2	no	yes	-0.0762524	K*LVILEGELERSEER	[Muscle contraction]	nf	nf	nf	nf	nf	nf	nf
Tubulin polymerization-promoting protein	Tppp	no	no	GK only	DCHVIDGK*NVTVTDVDIVFSK*		nf	nf	nf	nf	nf	0.118257	0.868388
Tyrosyl-tRNA synthetase	Yars	yes	yes	BN only	NIEQGGVK*IDGTVISDKGLK*	Aminoacyl-tRNA biosynthesis	0.235007	0.0470544	-0.225602	0.172678	4850341	0.712206	7.47964e-05
UDP-glucose 6-dehydrogenase	Ugdh	no	yes	GK only	VLIGGDETPEGQK*AVQALCAVYEHWVPR	Pentose and glucuronate interconversions; Ascorbate and aldarate metabolism; Starch and sucrose metabolism; Amino sugar and nucleotide sugar metabolism	0.134291	0.446901	-0.155726	0.526931	4060333	-0.269167	0.264198
